# Supplementary material for: Formation of HCHO, CO and H2 by methane oxidation with O2 over Cu catalysts stabilized in silicoaluminophosphates
Source: Royal Society of Chemistry journal article supplement (doi:10.1039/d4cy01469c), 2025-01-01
Supplement: d4cy01469c1.pdf [file d4cy01469c1.pdf]

## Supplementary information

### **Formation of HCHO, CO and H<sub>2</sub> by methane oxidation with O<sub>2</sub> over Cu catalysts stabilized in silicoaluminophosphates**

Mana Shimakawa,<sup>a</sup> Rieko Nagase,<sup>a</sup> Ryoya Kugo,<sup>a</sup> Junya Ohyama<sup>b</sup> and Sakae Takenaka<sup>a,\*</sup>

a. Department of Science and Engineering, Doshisha University, Tatara-miyakodani 1-3, Kyotanabe,  
Kyoto 610-0321, Japan.

E-mail:stakenak@mail.doshisha.ac.jp

b. Faculty of Advanced Science and Technology, Kumamoto University, 2-39-1 Kurokami, Chuo-ku,  
Kumamoto, 860-8555, Japan.

**Fig. S1.** XRD patterns for different metal catalysts supported on SAPO.

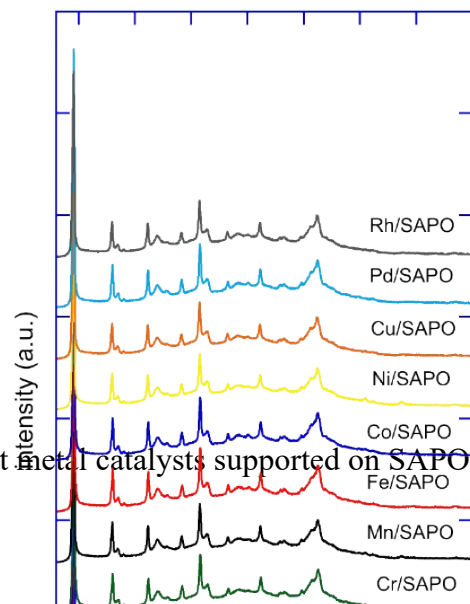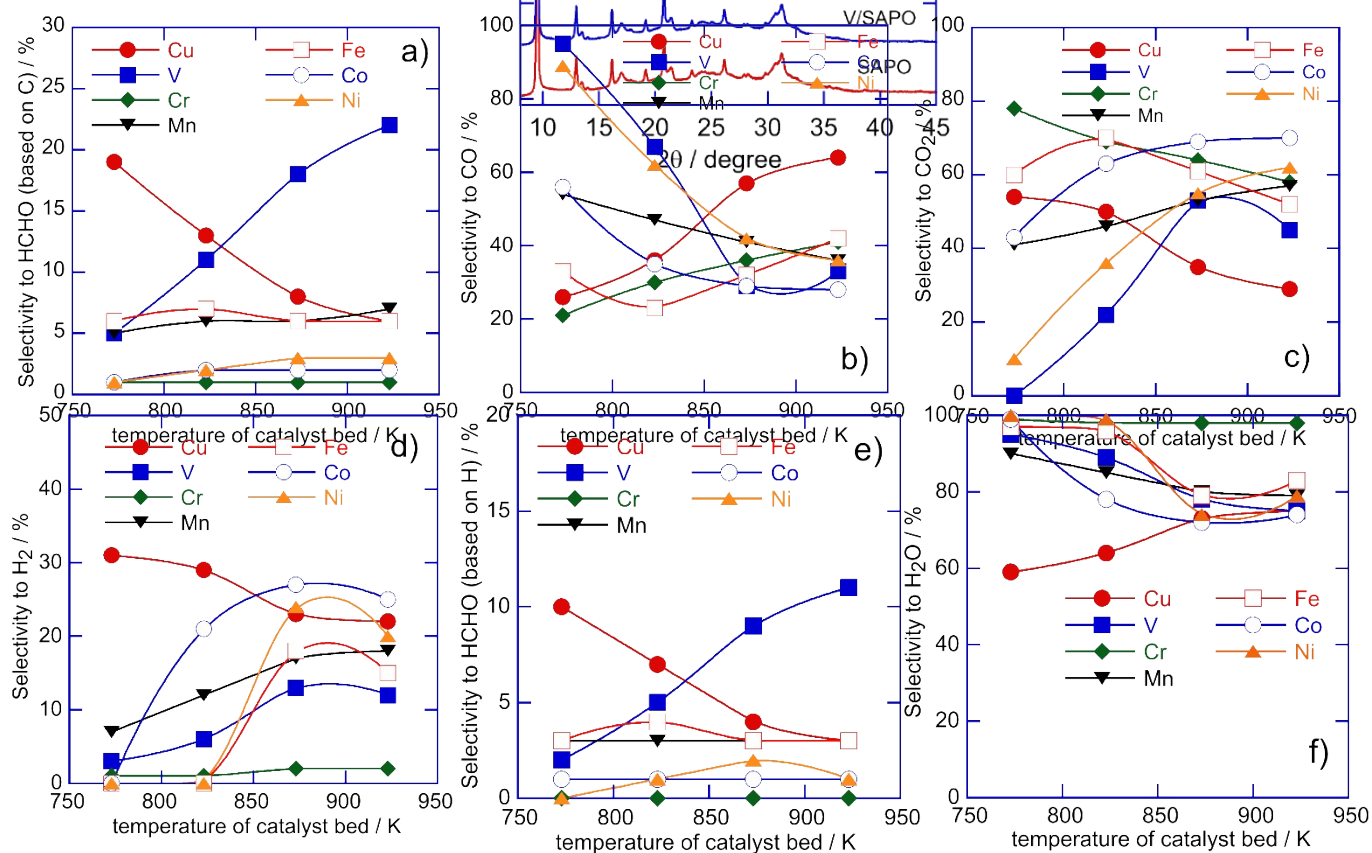

**Fig. S2** Selectivity to each product in the methane oxidation with O<sub>2</sub> over different metal catalysts supported on SAPO.

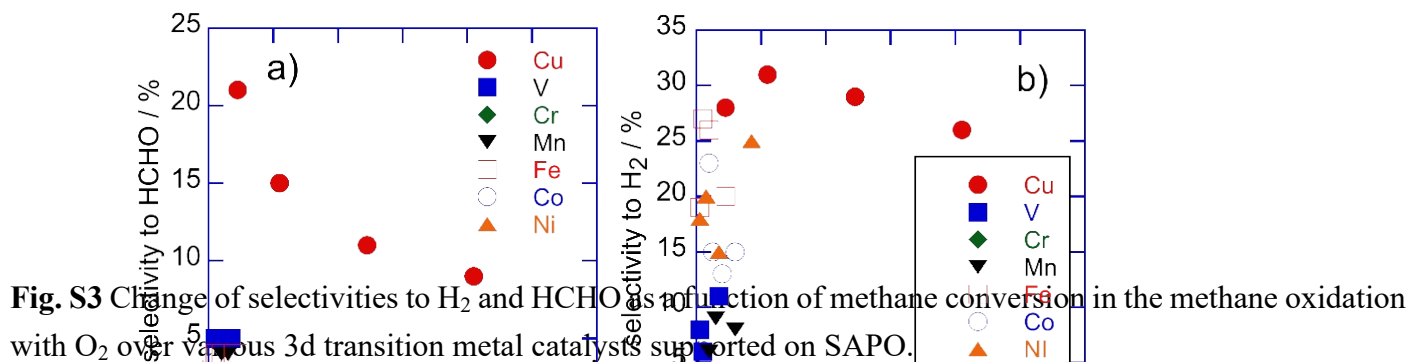

**Fig. S3** Change of selectivities to H<sub>2</sub> and HCHO as a function of methane conversion in the methane oxidation with O<sub>2</sub> over various 3d transition metal catalysts supported on SAPO.

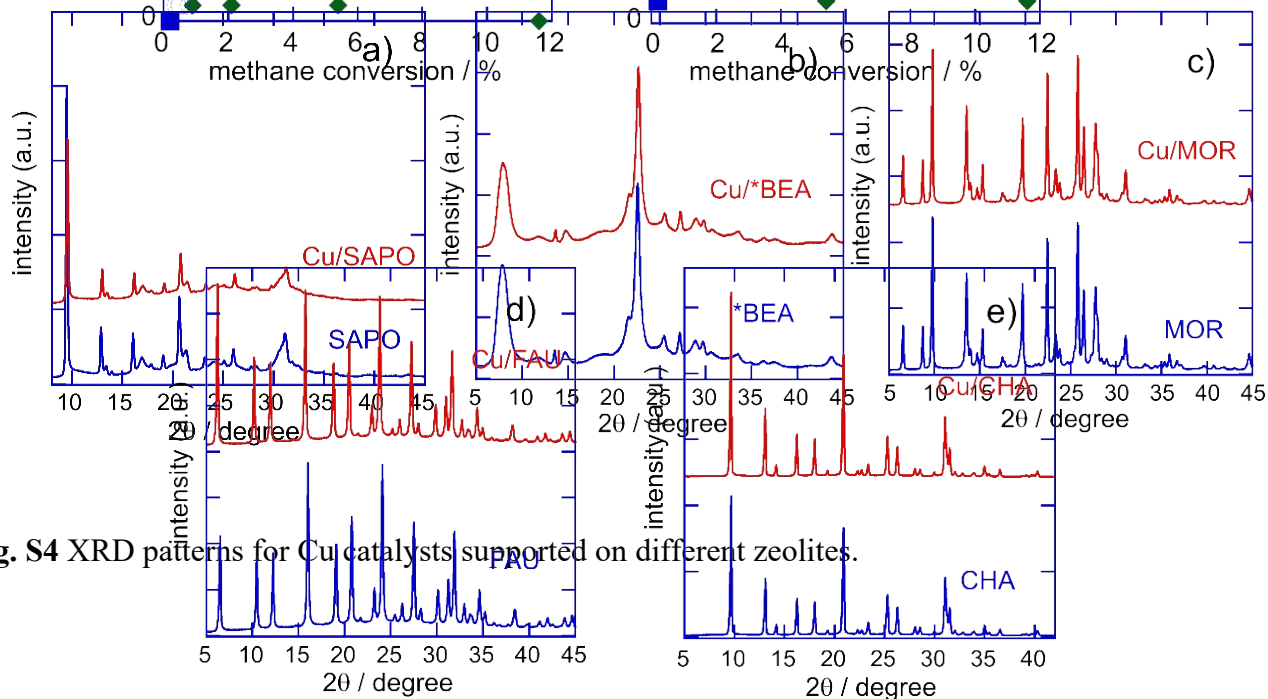

**Fig. S4** XRD patterns for Cu catalysts supported on different zeolites.

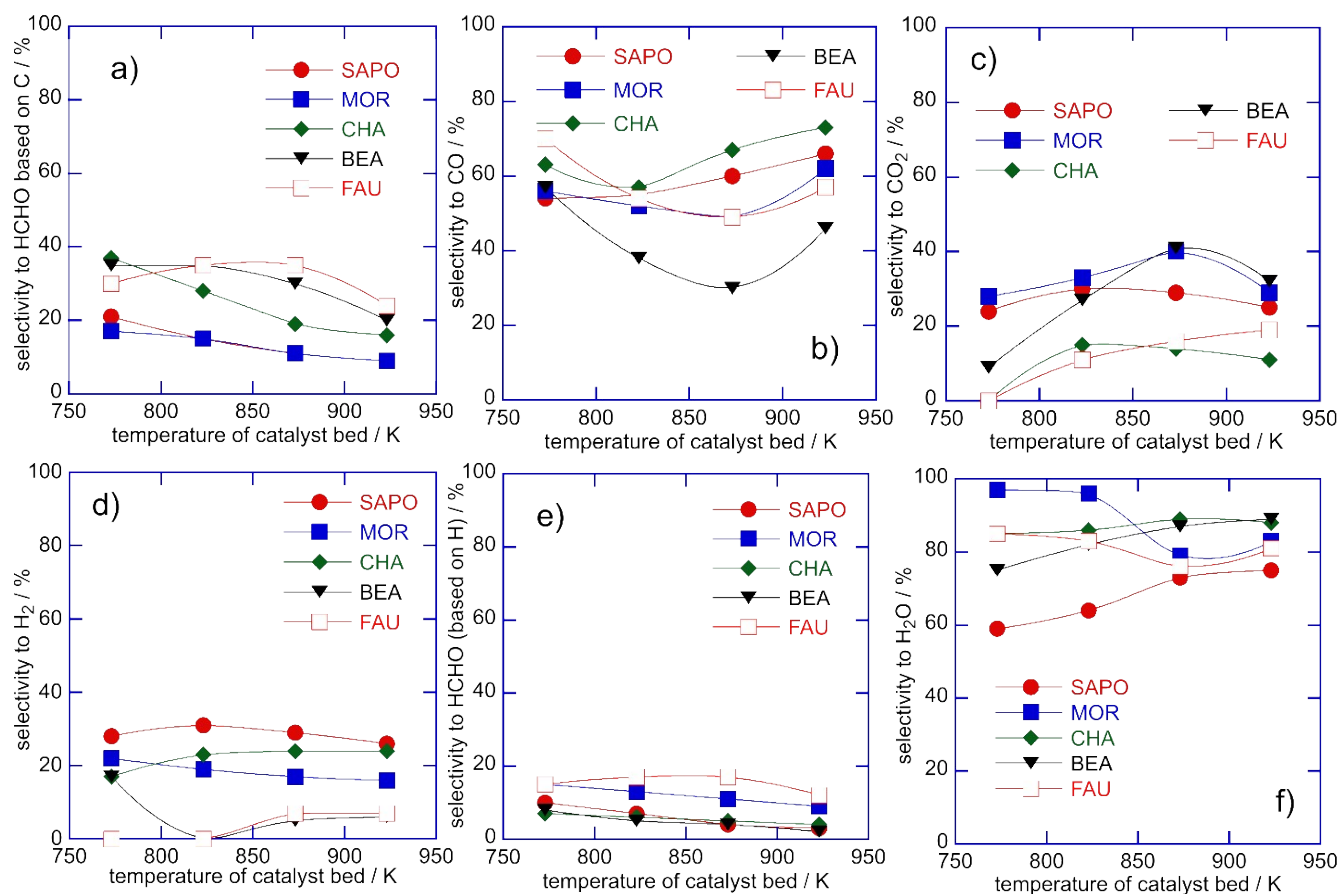

**Fig.S5** Methane oxidation with O<sub>2</sub> over Cu (0.5wt%) catalysts supported on different zeolites.

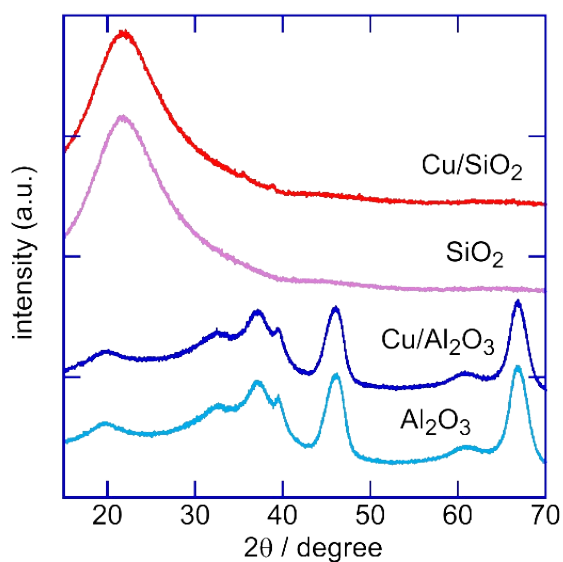

**Fig. S6** XRD patterns for Cu(0.5wt%)/Al<sub>2</sub>O<sub>3</sub> and Cu(0.5wt%)/SiO<sub>2</sub> catalysts.

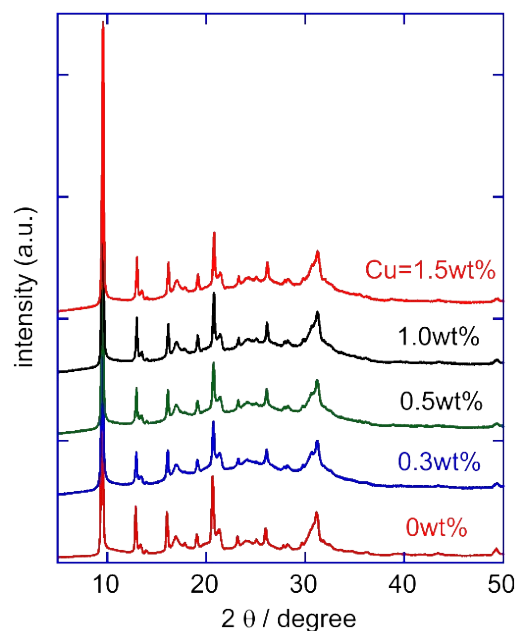

**Fig. S7** XRD patterns of Cu/SAPO catalysts with different Cu loadings.

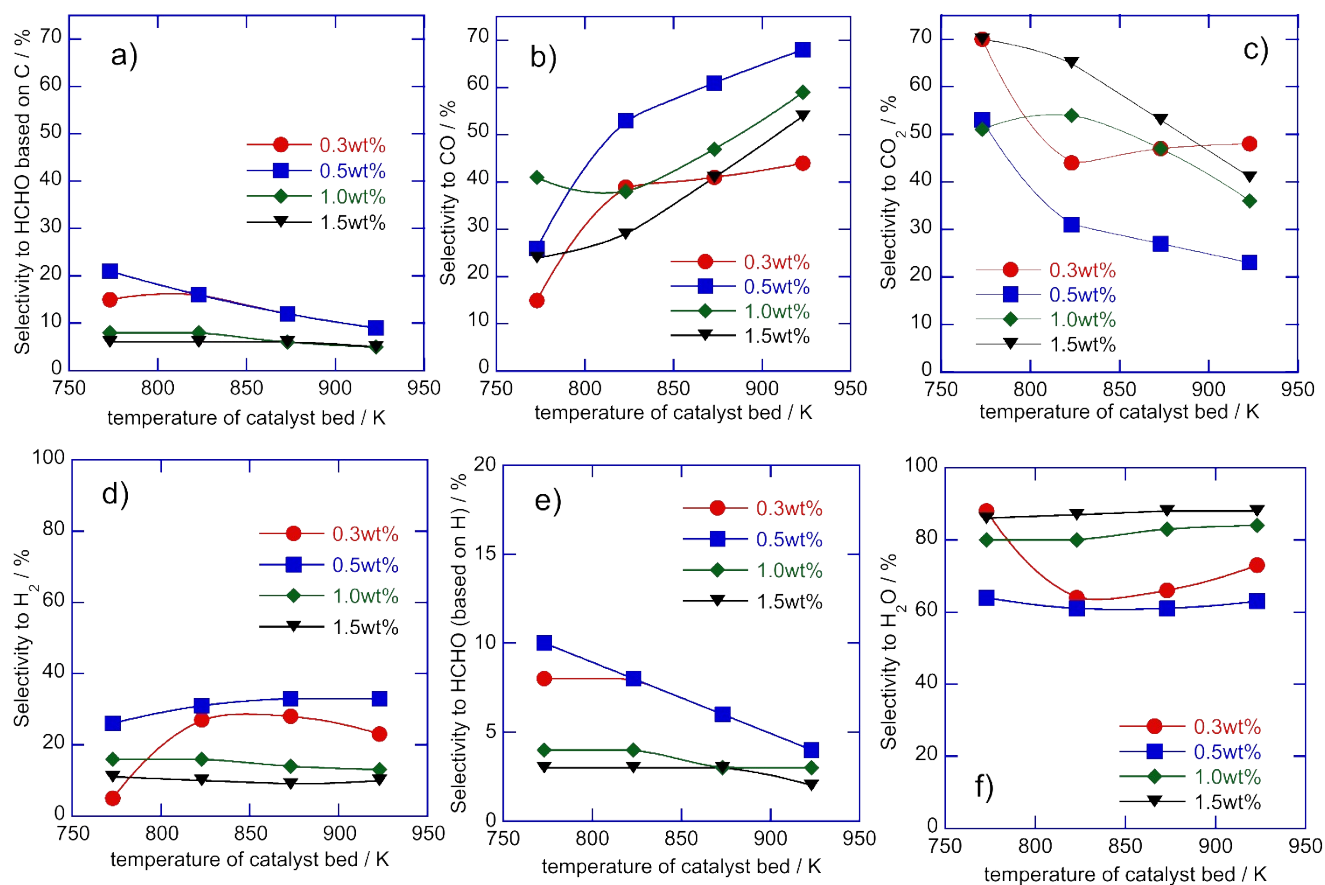

**Fig. S8** Methane oxidation with O<sub>2</sub> over Cu/SAPO catalysts with different Cu loadings.

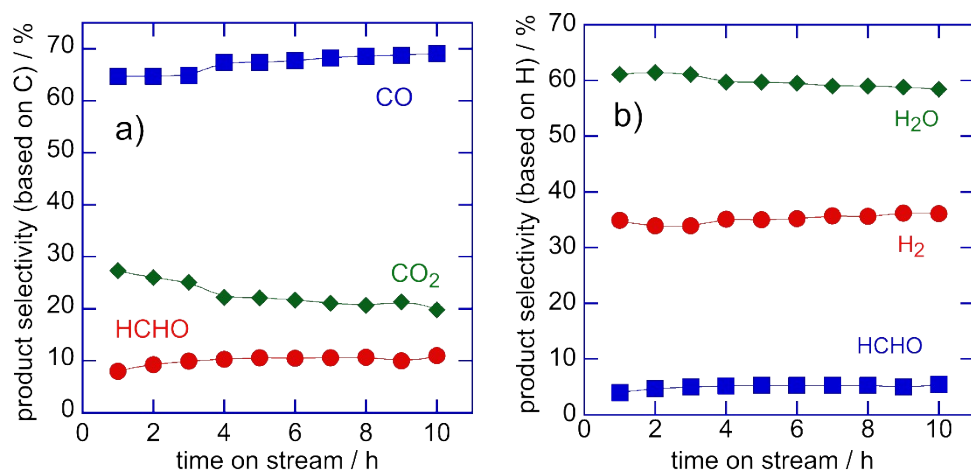

**Fig. S9** Change of selectivity to each product as a function of time on stream during the methane oxidation with O<sub>2</sub> over Cu(0.5 wt%)/SAPO catalysts at 923 K.
